# Supplementary material
Source: publisher site journal article supplement (https://www.dovepress.com/article/427337)
Supplement: Supplementary file 1 [file get_supplementary_file.php]

**Supplementary File**

**Information of the study**

We are researchers from Universitas Padjadjaran currently conducting a study on the public's knowledge and behavior regarding antibiotic use. We invite you to participate in this research. Your participation is voluntary, and you can decide whether to participate or not. All information you provide will be kept confidential.

**Research Objective:**

This study aims to analyze the level of knowledge and influencing factors related to the inappropriate use of antibiotics in the community.

**Why You Were Selected:**

You are a male or female aged at least 18 years, and you can fluently communicate in both spoken and written Indonesian, and you are not working in the healthcare services sector.

**Procedure:**

After reading this explanation of the study, you have the opportunity to ask for further information through the contact provided below. If you are sufficiently informed, then you will be asked to:

1. Agree to participate by signing an informed consent form.
2. Fill out the respondent information sheet.
3. Answer the questions on the questionnaire.

**Risks and Discomfort:**

Participating in this study carries no harm or risk. However, the measurement procedure will take a maximum of 10-15 minutes of your time.

**Benefits:**

This research is beneficial for understanding the public's knowledge regarding the use of antibiotics. After completing the questionnaire, participants will be provided with information on the correct use of antibiotics and through leaflets prepared by the researchers.

**Data Confidentiality:**

During your participation in this study, all information and research data will be treated confidentially and will not be disclosed to others.

**Voluntariness:**

Your participation in this research is voluntary and without any form of coercion.

**Subject Participation Period:**

This research will be conducted for 7 months, and your participation will last for 10-15 minutes during the questionnaire filling.

**Subject Withdrawal:**

You can withdraw from this study at any time if you wish.

**Questions:**

If you have any questions related to this research, please contact:

**Rano Kurnia Sinuraya, MPH (Principal Investigator)**

Department of Pharmacology and Clinical Pharmacy

Faculty of Pharmacy, Universitas Padjadjaran, Indonesia

Email: r.k.sinuraya@unpad.ac.id

**INFORMED CONSENT**

I have read or obtained a clear explanation, am fully aware of and understand the objectives, benefits, and risks that may arise in the research, and have been given the opportunity to ask questions and have them answered satisfactorily. I may withdraw and discontinue participation at any time without penalty. My participation in this project is voluntary. I understand that I will not be paid for my participation. I understand that my data will be kept confidentially and only be used for research.

Then, I

r Agree

r Disagree

to participate in this research, entitled:

“**Understanding Public Knowledge and Behavior Regarding Antibiotic Use in Indonesia”**

| **Date:** |
| --- |
| **Full name:** |
| **Phone/e-mail:** |

For further information, please contact:

Rano Kurnia Sinuraya, MPH. ([r.k.sinuraya@unpad.ac.id](mailto:r.k.sinuraya@unpad.ac.id))

**SUBMIT**

The information described below provides the questionnaire used in this study.

[Backgrounds]

| Name | : |  |
| --- | --- | --- |
| Sex | : | ( ) Male ( ) Female |
| Age | : | ……… years old |
| Occupation | : | ………… |
| Education | : | ( ) High School ( ) College or University |
| Address | : |  |
| Right now, do you have a child in kindergarten or primary school? | : | ( ) Yes ( ) No |
| Do you have chronic disease(s)? | : | ( ) Yes ( ) No |
| Are you currently using herbal medicine? | : | ( ) Yes ( ) No |
| There is a healthcare center near my house | : | ( ) Yes ( ) No |
| I have regular check-ups at least once a year | : | ( ) Yes ( ) No |
| I only go to the doctor when I am sick | : | ( ) Yes ( ) No |
| Even though I am sick, I do not go to the doctor | : | ( ) Yes ( ) No |
| I trust the doctor who examined me | : | ( ) Yes ( ) No |

[Knowledge]

| Questions | Your response |
| --- | --- |
| Flu can be treated quickly with antibiotics | ( ) Agree ( ) Disagree |
| Antibiotics are effective for treating fever | ( ) Agree ( ) Disagree |
| Antibiotics are effective for treating coughs | ( ) Agree ( ) Disagree |
| Antibiotics are effective for treating headaches | ( ) Agree ( ) Disagree |
| Antibiotics are effective for treating many diseases | ( ) Agree ( ) Disagree |
| Antibiotics can improve the effectiveness of multivitamins | ( ) Agree ( ) Disagree |
| Antibiotics are effective for killing bacteria | ( ) Agree ( ) Disagree |
| Antibiotics are effective for killing viruses | ( ) Agree ( ) Disagree |

[Behavior]

| Questions | Your response |
| --- | --- |
| I keep antibiotic prescriptions for later use | ( ) Agree ( ) Disagree |
| I share antibiotics with family and friends | ( ) Agree ( ) Disagree |
| When I improve, I stop taking antibiotics even if I have some left | ( ) Agree ( ) Disagree |
| I completed the full course of prescribed antibiotics | ( ) Agree ( ) Disagree |
| I anticipate receiving an antibiotic prescription when I visit the doctor | ( ) Agree ( ) Disagree |
| Doctors are obligated to prescribe antibiotics whenever I fall ill | ( ) Agree ( ) Disagree |
| If prescribed by the doctor, I can buy the same drug later for recurring symptoms without another doctor visit | ( ) Agree ( ) Disagree |

**====Thank you for participating in this study===**
